# Supplementary material
Source: Springer Nature journal article supplement (https://www.springermedizin.de/resource/supplementary/12957_2009_662_MOESM1_ESM.pdf/9565450)

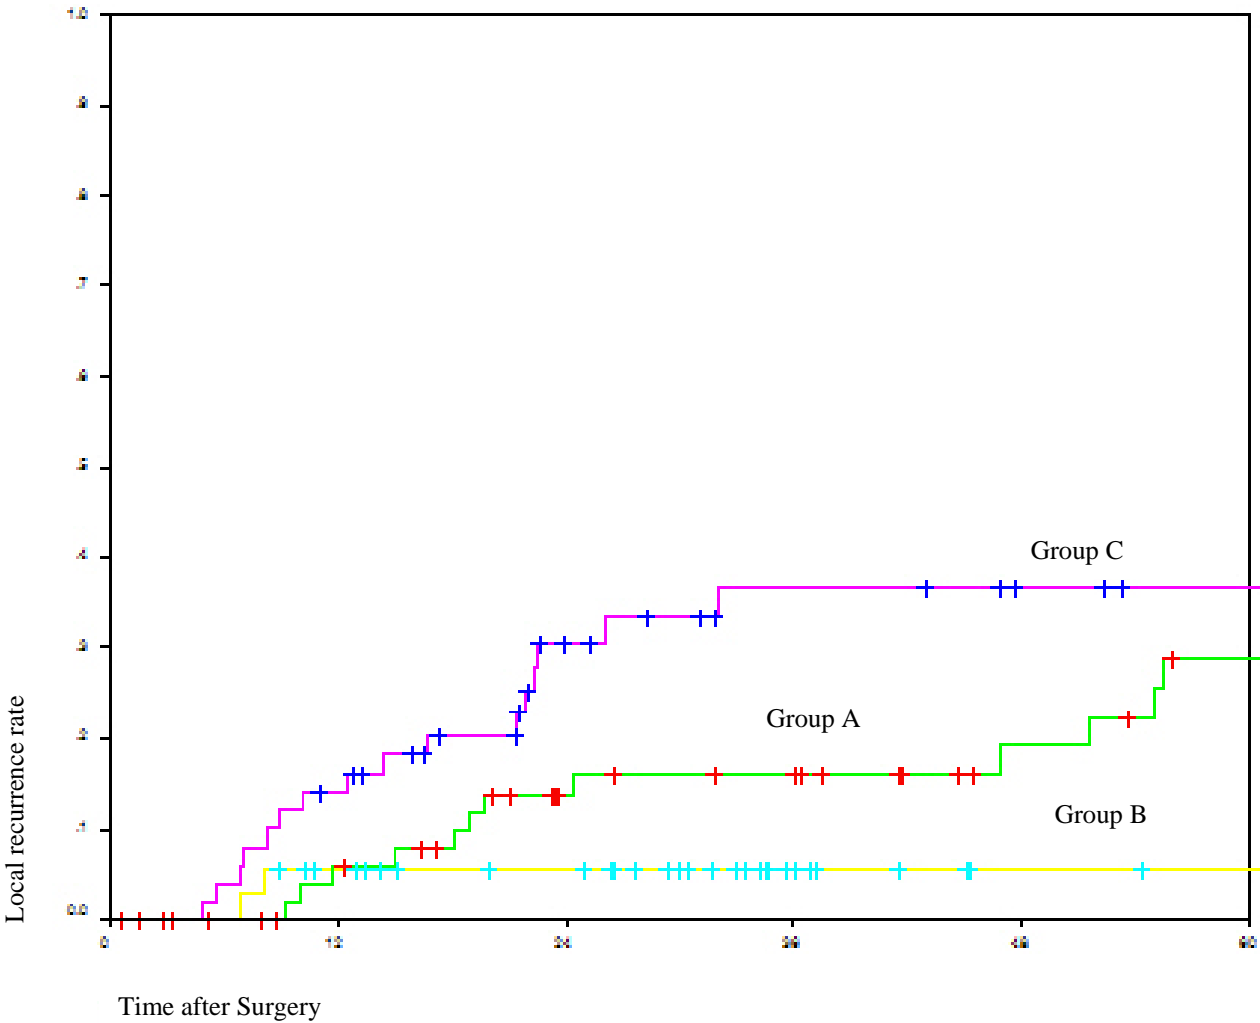

Supplement: MOESM1 [file 9565450]
